# Supplementary material for: Characterization of the target of ivermectin, the glutamate-gated chloride channel, fromAnopheles gambiae
Source: Oxford University Press journal article supplement (doi:10.1242/jeb.118570), 2015-05-15
Supplement: jeb118570supp.pdf [file jeb118570supp.pdf]

|                  |                                                               |     |
|------------------|---------------------------------------------------------------|-----|
| AgGluCl-a1       | MASGHFFWAIIFYFACLCSASLANNAKVN----FRE-----                     | 31  |
| AgGluCl-a2       | MASGHFFWAIIFYFACLCSASLANNAKVN----FRE-----                     | 31  |
| AgGluCl-b        | MASGHFFWAIIFYFACLCSASLANNAKVN----FRE-----                     | 31  |
| AgGluCl-c        | MASGHFFWAIIFYFACLCSASLANNAKVN----FRE-----                     | 31  |
| DmGluCl          | MGSGHYFWAILYFASLCSASLANNAKVN----FRE-----                      | 31  |
| CeGluCl $\alpha$ | MAT--WIVGKLI IASLILGIQAQQARTKSQDI FEDDNDNGTTTLESRLRLTSPHIPIEQ | 58  |
|                  | *                                                             |     |
| AgGluCl-a1       | ---KEKKILDQILGAGKYDARIRPSGNGTDG-PAIVRINLNFVRSIMTISDIKMEYSVQL  | 87  |
| AgGluCl-a2       | ---KEKKILDQILGAGKYDARIRPSGNGTDG-PAIVRINLNFVRSIMTISDIKMEYSVQL  | 87  |
| AgGluCl-b        | ---KEKKILDQILGAGKYDARIRPSGNGTDG-PAVVRVNI FVRSISKIDDDVMEYSVQL  | 87  |
| AgGluCl-c        | ---KEKKILDQILGAGKYDARIRPSGNGTDDKATQVFVNMFLRSISKIDDDYKMEYSVQL  | 88  |
| DmGluCl          | ---KEKKVLDQILGAGKYDARIRPSGNGTDG-PAIVRINLNFVRSIMTISDIKMEYSVQL  | 87  |
| CeGluCl $\alpha$ | PQTSDSKILAHLFTSG-YDFRVRPP---TDNGGPVVSVNMLLRTISKIDVVNMEYSVQL   | 114 |
|                  | * * *                                                         |     |
| AgGluCl-a1       | TFREQWLDERLKFDDIG-GRLYLTLTEANRVWMPDLFFSNEKEGHFHNI IMPNVYIRIF  | 146 |
| AgGluCl-a2       | TFREQWLDERLKFDDIG-GRLYLTLTEANRVWMPDLFFSNEKEGHFHNI IMPNVYIRIF  | 146 |
| AgGluCl-b        | TFREQWLDERLKFDDIG-GRLYLTLTEANRVWMPDLFFSNEKEGHFHNI IMPNVYIRIF  | 146 |
| AgGluCl-c        | TFREQWLDERLKFDDIG-GRLYLTLTEANRVWMPDLFFSNEKEGHFHNI IMPNVYIRIF  | 147 |
| DmGluCl          | TFREQWTDERLKFDDIQ-GRLYLTLTEANRVWMPDLFFSNEKEGHFHNI IMPNVYIRIF  | 146 |
| CeGluCl $\alpha$ | TLRESWIDKRLSYGVKGDGQDPFVILTVGHQIWMPDTFFPNKQAYKHTIDKPNVLRIRIH  | 174 |
|                  | * ** *                                                        |     |
| AgGluCl-a1       | PYGSVLYSIRVSLTLACPMNLKLYPLDRQVCSLRMASYGWTTADLVFLWKEGDPVQVVKV  | 206 |
| AgGluCl-a2       | PYGSVLYSIRVSPPTLACPTNLKLYPLDRQVCSLRMASYGWTTADLVFLWKEGDPVQVVKV | 206 |
| AgGluCl-b        | PYGSVLYSIRVSLTLACPMNLKLYPLDRQVCSLRMASYGWTTADLVFLWKEGDPVQVVKV  | 206 |
| AgGluCl-c        | PYGSVLYSIRVSLTLACPMNLKLYPLDRQVCSLRMASYGWTTADLVFLWKEGDPVQVVKV  | 207 |
| DmGluCl          | PNGSVLYSIRISLTLACPMNLKLYPLDRQVCSLRMASYGWTTNDLVFLWKEGDPVQVVKV  | 206 |
| CeGluCl $\alpha$ | NDGTVLYSVRISLVLSCPMYLQYYPMDVQCCSIDLASAYATTKDIEYLWKEHSPLQLKVG  | 234 |
|                  | * * #                                                         |     |
| AgGluCl-a1       | LH--LPRFTELEKFLTDYCNSKNTTGEYSCLKVDLLFKREFSYLIQIYIPCCMLVIVSWV  | 264 |
| AgGluCl-a2       | LH--LPRFTELEKFLTDYCNSKNTTGEYSCLKVDLLFKREFSYLIQIYIPCCMLVIVSWV  | 264 |
| AgGluCl-b        | LH--LPRFTELEKFLTDYCNSKNTTGEYSCLKVDLLFKREFSYLIQIYIPCCMLVIVSWV  | 264 |
| AgGluCl-c        | LH--LPRFTELEKFLTDYCNSKNTTGEYSCLKVDLLFKREFSYLIQIYIPCCMLVIVSWV  | 265 |
| DmGluCl          | LH--LPRFTELEKFLTDYCNSKNTTGEYSCLKVDLLFRREFSYLIQIYIPCCMLVIVSWV  | 264 |
| CeGluCl $\alpha$ | LSSSLPSFQLTNTSTTYCTSVTNTGIYSCLRRTIQLKREFSYLLQLYIPSCMLVIVSWV   | 294 |
|                  | # #                                                           |     |
| AgGluCl-a1       | SFWLDQGAVPARVSLGVTLLTMTATQTSGINASLPPVSYTKAIDVWTGVCLTFVFGALLE  | 324 |
| AgGluCl-a2       | SFWLDQGAVPARVSLGVTLLTMTATQTSGINASLPPVSYTKAIDVWTGVCLTFVFGALLE  | 324 |
| AgGluCl-b        | SFWLDQGAVPARVSLGVTLLTMTATQTSGINASLPPVSYTKAIDVWTGVCLTFVFGALLE  | 324 |
| AgGluCl-c        | SFWLDQGAVPARVSLGVTLLTMTATQTSGINASLPPVSYTKAIDVWTGVCLTFVFGALLE  | 325 |
| DmGluCl          | SFWLDQGAVPARVSLGVTLLTMTATQTSGINASLPPVSYTKAIDVWTGVCLTFVFGALLE  | 324 |
| CeGluCl $\alpha$ | SFWFDRTAIPARVTLGVTLLTMTAQAASAGINSQLPPVSYIKAIDVWIGACMTFIFCALLE | 354 |
| AgGluCl-a1       | FALVNYASRS-----DMHRENMKKKRREMEQASLDAASDLLDTSNATFAMKPLVRHPGD   | 379 |
| AgGluCl-a2       | FALVNYASRS-----DMHRENMKKKRREMEQASLDAASDLLDTSNATFAMKPLVRHPGD   | 379 |
| AgGluCl-b        | FALVNYASRSADRAADMHRENMKKKRREMEQASLDAASDLLDTSNATFAMKPLVRHPGD   | 384 |
| AgGluCl-c        | FALVNYASRS-----DMHRENMKKKRREMEQASLDAASDLLDTSNATFAMKPLVRHPGD   | 380 |
| DmGluCl          | FALVNYASRSGSNKANMHKENMKKKRRDLEQASLDAASDLLDTSNATFAMKPLVRHPGD   | 384 |
| CeGluCl $\alpha$ | FALVNHIANK-----QGVERKARTEREKAEIPLLQNLHNDVPTKVFNQEEKVRT---     | 403 |
| AgGluCl-a1       | PLALEKLRQCEVHMQAPKRPNCCRSWLSKFPTR-----QCSRSKRIDVISRITF        | 428 |
| AgGluCl-a2       | PLALEKLRQCEVHMQAPKRPNCCRSWLSKFPPTSPFKKVPCLGRGQCSRSKRIDVISRITF | 439 |
| AgGluCl-b        | PLALEKLRQCEVHMQAPKRPNCCRSWLSKFPPTSPFKKVPCLGRGQCSRSKRIDVISRITF | 444 |
| AgGluCl-c        | PLALEKLRQCEVHMQAPKRPNCCRSWLSKFPTR-----QCSRSKRIDVISRITF        | 429 |
| DmGluCl          | PLALEKLRQCEVHMQAPKRPNCCCKTWSKFPTR-----QCSRSKRIDVISRITF        | 433 |
| CeGluCl $\alpha$ | -----VPLNRRQMNSFLNLETKT-----EWNDISKRVDLISRALF                 | 439 |
| AgGluCl-a1       | PLVFALFNLVYWSTYLFREEEED                                       | 451 |
| AgGluCl-a2       | PLVFALFNLVYWSTYLFREEEED                                       | 462 |
| AgGluCl-b        | PLVFALFNLVYWSTYLFREEEED                                       | 467 |
| AgGluCl-c        | PLVFALFNLVYWSTYLFREEEED                                       | 452 |
| DmGluCl          | PLVFALFNLVYWSTYLFREEEED                                       | 456 |
| CeGluCl $\alpha$ | PVLFFVFNILYWSRFGQQNVLF-                                       | 461 |

**Fig. S1. ClustalW alignment of AgGluCl amino acid sequences with *D. melanogaster* GluCl (DmGluCl) and *C. elegans* GluCl (CeGluCl). Black bar denotes transmembrane domains. (\*) glutamate binding residues; (#) critical residues for ivermectin binding.**
